# Supplementary material for: Capillary photoionization: interface for low flow rate liquid chromatography-mass spectrometry
Source: Royal Society of Chemistry journal article supplement (doi:10.1039/c9an00258h), 2019-01-01
Supplement: c9an00258h1.pdf [file c9an00258h1.pdf]

## Electronic Supplementary Information

### Capillary photoionization: Interface for low flow rate liquid chromatography-mass spectrometry

Päivi Pöhö,<sup>1</sup> Anu Vaikkinen,<sup>1</sup> Markus Haapala,<sup>1</sup> Petri Kylli,<sup>1</sup> Risto Kostainen<sup>1\*</sup>

<sup>1</sup> Drug Research Program, Division of Pharmaceutical Chemistry and Technology, Faculty of Pharmacy, University of Helsinki, 00014 FINLAND

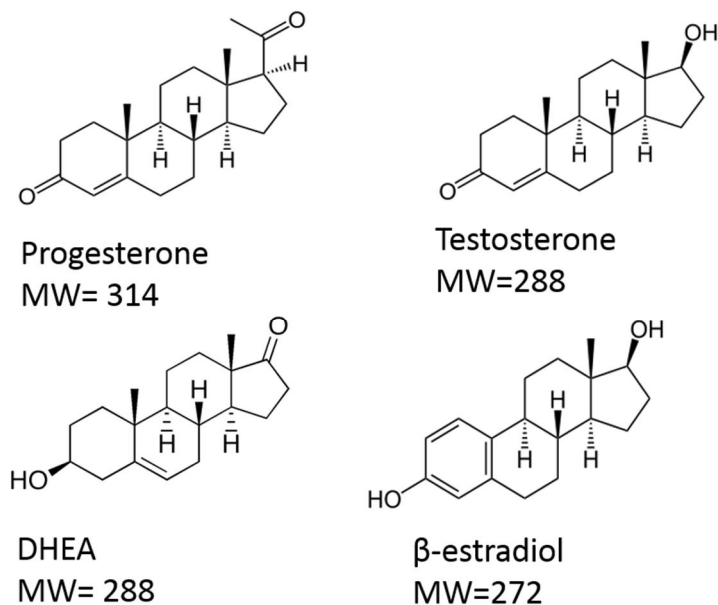

Fig. S1 Steroid structures

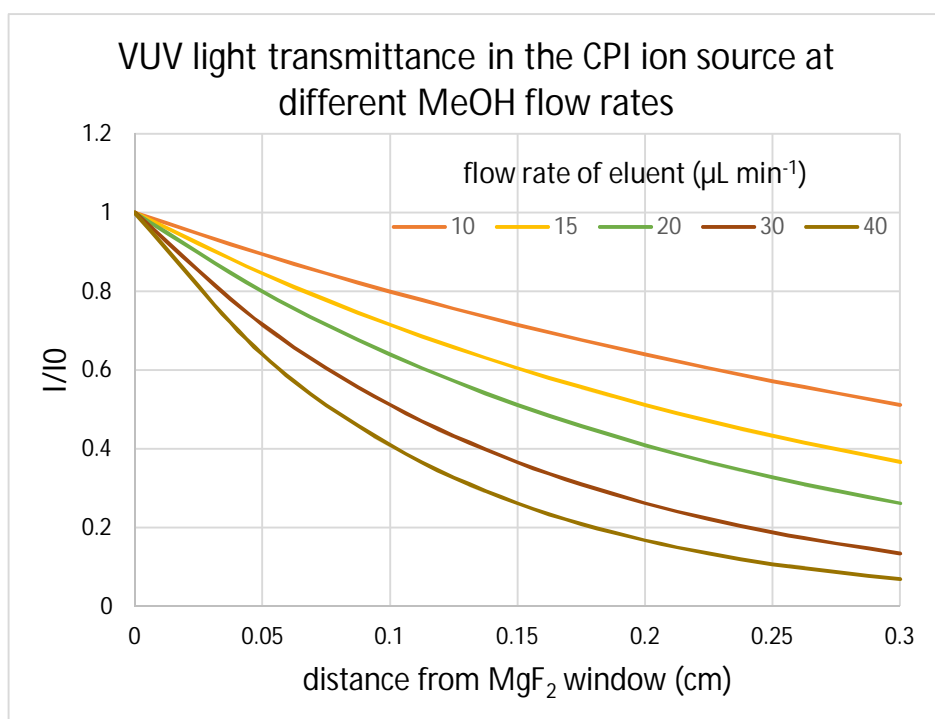

Fig. S2 Transmittance of 10.0 and 10.6 eV photons ( $I/I_0$ ) in the CPI ion source assuming a simple absorbance model according to Lambert Beer's law:  $\frac{I}{I_0} = e^{-\sigma n x}$ ,  $\sigma$  = photoabsorption cross-section (for MeOH  $15 \times 10^{-18} \text{cm}^2/\text{molecule}$ ),<sup>1</sup>  $n$  = molecular density (molecules/ $\text{cm}^3$ ), and  $x$  = travelled distance i.e. distance from the  $\text{MgF}_2$  window (in cm). Molecular density was calculated assuming 1  $\text{L min}^{-1}$  total flow rate through the ion source and even distribution of eluent in the flow.

## References

- 1 J. B. Nee, M. Suto, L.C. Lee, Chem. Phys., 1985, 98, 147-155.
